# Supplementary material for: Non-disruptive collagen characterization in clinical histopathology using cross-modality image synthesis
Source: PubMed Central journal article supplement (PMC7395097; doi:10.1038/s42003-020-01151-5), 2020-07-31
Supplement: 42003_2020_1151_MOESM5_ESM.pdf [file 42003_2020_1151_MOESM5_ESM.pdf]

## Description of Additional Supplementary Files

**File Name: Supplementary Data 1**

**Description** CurveAlign analysis results for real SHG collagen fiber orientation and synthesized SHG collagen fiber orientation.

**File Name: Supplementary Data 2**

**Description** Collagen fiber orientation and alignment analysis across ROIs using CurveAlign on real SHG images and synthesized SHG images.
